# Supplementary material for: El discurso de Patxi López
Source: HighWire-hosted journal article supplement (doi:10.1136/bmjresp-2020-000832), 2009-01-01
Supplement: bmjresp-2020-000832supp001_data_supplement.pdf [file bmjresp-2020-000832supp001_data_supplement.pdf]

Supplementary Table 1. Cough-related characteristics in chronic cough and subacute cough patients

|                                                               |                                            | Chronic cough patients<br>(N=568) |      | Subacute cough patients<br>(N=378) |     |
|---------------------------------------------------------------|--------------------------------------------|-----------------------------------|------|------------------------------------|-----|
|                                                               |                                            | Mean                              | SD   | Mean                               | SD  |
| Years experienced chronic cough †                             |                                            | 3.39                              | 3.28 | N.A                                | N.A |
|                                                               |                                            | Count (%)                         |      | Count (%)                          |     |
| Currently smoke cigarettes<br>(Chronic cough survey)          | No                                         | 391 (68.8%)                       |      | 249 (65.9%)                        |     |
|                                                               | Yes                                        | 177 (31.2%)                       |      | 129 (34.1%)                        |     |
| Smoked cigarettes in last 12 months<br>(Chronic cough survey) | No                                         | 378 (66.5%)                       |      | 241 (63.8%)                        |     |
|                                                               | Yes                                        | 190 (33.5%)                       |      | 137 (36.2%)                        |     |
| Cough more severe at a certain time of year                   | No                                         | 139 (66.5%)                       |      | 45 (22.1%)                         |     |
|                                                               | Yes                                        | 70 (33.5%)                        |      | 25 (12.3%)                         |     |
| Cough most severe in:                                         | Spring (March, April, May)                 | 17 (24.3%)                        |      | 63 (30.9%)                         |     |
|                                                               | Summer (June, July, August)                | 9 (12.9%)                         |      | 71 (34.8%)                         |     |
|                                                               | Fall/Autumn (September, October, November) | 17 (24.3%)                        |      | 17 (4.5%)                          |     |
|                                                               | Winter (December, January, February)       | 27 (38.6%)                        |      | 66 (17.5%)                         |     |
|                                                               | Yes                                        | 22 (7.0%)                         |      | 45 (22.1%)                         |     |
| Cough improves when stopped smoking                           | No                                         | 74 (23.6%)                        |      | 25 (12.3%)                         |     |
|                                                               | Don't know                                 | 86 (27.5%)                        |      | 63 (30.9%)                         |     |
|                                                               | I did not stop smoking                     | 131 (41.9%)                       |      | 71 (34.8%)                         |     |
|                                                               | Never                                      | 41 (7.3%)                         |      | 17 (4.5%)                          |     |
| How often do you cough up phlegm when<br>you cough            | Rarely                                     | 105 (18.6%)                       |      | 66 (17.5%)                         |     |
|                                                               | Sometimes                                  | 211 (37.3%)                       |      | 152 (40.3%)                        |     |
|                                                               | Often                                      | 127 (22.5%)                       |      | 108 (28.6%)                        |     |
|                                                               | Always                                     | 81 (14.3%)                        |      | 34 (9.0%)                          |     |
| Discussion on diet/weight loss to improve<br>GERD             | No                                         | 11 (57.9%)                        |      | 2 (40.0%)                          |     |
|                                                               | Yes                                        | 8 (42.1%)                         |      | 3 (60.0%)                          |     |
| Cough start/exacerbate with cold or flu-like<br>illness       | Yes                                        | 138 (24.5%)                       |      | 155 (41.3%)                        |     |
|                                                               | No                                         | 312 (55.3%)                       |      | 148 (39.5%)                        |     |
|                                                               | Don't know                                 | 114 (20.2%)                       |      | 72 (19.2%)                         |     |

† Sample size: CC (N=341)

Supplementary Table 2. Point prevalence and 12-month period prevalence estimate for chronic and subacute cough *among non-smokers*

|                |                 | Point prevalence<br>(before exclusion) |       |            | Point prevalence<br>(after exclusion †) |            | 12-month period<br>prevalence |            |
|----------------|-----------------|----------------------------------------|-------|------------|-----------------------------------------|------------|-------------------------------|------------|
|                |                 | Total                                  | Count | Prevalence | Count                                   | Prevalence | Count                         | Prevalence |
| Chronic cough  | All respondents | 19,440                                 | 478   | 2.46%      | 401                                     | 2.06%      | 762                           | 3.92%      |
|                | <60 male        | 5,308                                  | 120   | 2.26%      | 103                                     | 1.94%      | 189                           | 3.56%      |
|                | <60 female      | 6,192                                  | 109   | 1.76%      | 93                                      | 1.50%      | 232                           | 3.75%      |
|                | ≥60 male        | 4,366                                  | 147   | 3.37%      | 118                                     | 2.70%      | 192                           | 4.40%      |
|                | ≥60 female      | 3,574                                  | 102   | 2.85%      | 87                                      | 2.43%      | 149                           | 4.17%      |
| Subacute cough | All respondents | 19,440                                 | 355   | 1.82%      | 281                                     | 1.45%      | 1,084                         | 5.58%      |
|                | <60 male        | 5,308                                  | 119   | 2.24%      | 81                                      | 1.53%      | 324                           | 6.10%      |
|                | <60 female      | 6,192                                  | 116   | 1.87%      | 99                                      | 1.60%      | 416                           | 6.72%      |
|                | ≥60 male        | 4,366                                  | 77    | 1.76%      | 63                                      | 1.44%      | 179                           | 4.10%      |
|                | ≥60 female      | 3,574                                  | 43    | 1.20%      | 38                                      | 1.06%      | 165                           | 4.62%      |

† Respondents were excluded from the analysis if they met any of the following criteria: i) self-reported in NHWS or the chronic cough survey of any form of lung cancer, interstitial lung disease, such as idiopathic pulmonary fibrosis, or currently taking an ACE inhibitor; or ii) self-reported experienced chronic cough in the NHWS but did not participate in the chronic cough survey.

**Supplementary Table 3. Demographics, health characteristics and cough severity among chronic cough patients not smoking vs. smoking.**

|                                                            |                             | Total CC<br>(N=568) |       | Not smoking CC<br>(N=391) |       | Smoking CC<br>(N=177) |       | p-value |
|------------------------------------------------------------|-----------------------------|---------------------|-------|---------------------------|-------|-----------------------|-------|---------|
|                                                            |                             | Mean                | SD    | Mean                      | SD    | Mean                  | SD    |         |
| Age                                                        |                             | 56.01               | 15.15 | 57.07                     | 15.63 | 53.66                 | 13.79 | 0.013   |
| Charlson Comorbidity index                                 |                             | 0.33                | 0.67  | 0.31                      | 0.62  | 0.35                  | 0.75  | 0.554   |
| Adapted Charlson Comorbidity index                         |                             | 0.23                | 0.55  | 0.21                      | 0.51  | 0.28                  | 0.62  | 0.161   |
|                                                            |                             | Count (%)           |       | Count (%)                 |       | Count (%)             |       |         |
| Gender                                                     | Male                        | 347 (61.10%)        |       | 212 (54.20%)              |       | 135 (76.30%)          |       | < .001  |
|                                                            | Female                      | 221 (38.90%)        |       | 179 (45.80%)              |       | 42 (23.70%)           |       |         |
| Currently employed                                         | No                          | 252 (44.40%)        |       | 198 (50.60%)              |       | 54 (30.50%)           |       | < .001  |
|                                                            | Yes                         | 316 (55.60%)        |       | 193 (49.40%)              |       | 123 (69.50%)          |       |         |
| BMI category                                               | Underweight (BMI<18.5)      | 54 (9.50%)          |       | 41 (10.50%)               |       | 13 (7.30%)            |       | 0.043   |
|                                                            | Normal weight (18.5≤BMI<23) | 373 (65.70%)        |       | 256 (65.50%)              |       | 117 (66.10%)          |       |         |
|                                                            | Overweight (23≤BMI<25)      | 94 (16.50%)         |       | 56 (14.30%)               |       | 38 (21.50%)           |       |         |
|                                                            | Obese (BMI≥25)              | 31 (5.50%)          |       | 27 (6.90%)                |       | 4 (2.30%)             |       |         |
|                                                            | Decline to answer           | 16 (2.80%)          |       | 11 (2.80%)                |       | 5 (2.80%)             |       |         |
| Use of alcohol                                             | Abstain                     | 191 (33.60%)        |       | 147 (37.60%)              |       | 44 (24.90%)           |       | 0.003   |
|                                                            | Currently consume alcohol   | 377 (66.40%)        |       | 244 (62.40%)              |       | 133 (75.10%)          |       |         |
| Vigorous exercise in past 30 days                          | No                          | 305 (53.70%)        |       | 210 (53.70%)              |       | 95 (53.70%)           |       | 0.994   |
|                                                            | Yes                         | 263 (46.30%)        |       | 181 (46.30%)              |       | 82 (46.30%)           |       |         |
| Ever spoken with a physician for your cough †              | No                          | 313 (55.10%)        |       | 185 (47.30%)              |       | 128 (72.30%)          |       | < .001  |
|                                                            | Yes                         | 251 (44.20%)        |       | 204 (52.20%)              |       | 47 (26.60%)           |       |         |
| Severity VAS (0-100) ‡                                     |                             | Mean                | SD    | Mean                      | SD    | Mean                  | SD    |         |
| Severity of cough over the past 2 weeks                    |                             | 40.54               | 21.6  | 38.72                     | 21.46 | 44.60                 | 21.43 | 0.003   |
| Severity of cough on the worst day during the past 2 weeks |                             | 49.88               | 23.93 | 48.19                     | 24.05 | 53.63                 | 23.29 | 0.012   |

† Sample size: Total CC(N=564), Not smoking (N=389), Smoking (N=175)

‡ Sample size: Total CC (N=565), Not smoking (N=389), Smoking (N=176)

**Supplementary Table 4. Demographics, health characteristics and cough severity between chronic cough patients whose underlying disease of chronic cough were unknown and all other chronic cough patients.**

|                                                            |                             | Total CC<br>(N=568) |       | All other CC patients<br>(N=514) |       | CC patients without<br>known underlying disease<br>(N=54) |       | p-value |
|------------------------------------------------------------|-----------------------------|---------------------|-------|----------------------------------|-------|-----------------------------------------------------------|-------|---------|
|                                                            |                             | Mean                | SD    | Mean                             | SD    | Mean                                                      | SD    |         |
| Age                                                        |                             | 56.01               | 15.15 | 55.63                            | 15.29 | 59.57                                                     | 13.40 | 0.069   |
| Charlson Comorbidity index                                 |                             | 0.33                | 0.67  | 0.32                             | 0.66  | 0.41                                                      | 0.69  | 0.343   |
| Adapted Charlson Comorbidity index                         |                             | 0.23                | 0.55  | 0.22                             | 0.53  | 0.35                                                      | 0.68  | 0.083   |
|                                                            |                             | Count (%)           |       | Count (%)                        |       | Count (%)                                                 |       |         |
| Gender                                                     | Male                        | 347 (61.1%)         |       | 317 (61.7%)                      |       | 30 (55.6%)                                                |       | 0.380   |
|                                                            | Female                      | 221 (38.9%)         |       | 197 (38.3%)                      |       | 24 (44.4%)                                                |       |         |
| Currently employed                                         | No                          | 252 (44.4%)         |       | 226 (44.0%)                      |       | 26 (48.1%)                                                |       | 0.557   |
|                                                            | Yes                         | 316 (55.6%)         |       | 288 (56.0%)                      |       | 28 (51.9%)                                                |       |         |
| BMI category                                               | Underweight (BMI<18.5)      | 54 (9.5%)           |       | 47 (9.1%)                        |       | 7 (13.0%)                                                 |       | 0.193   |
|                                                            | Normal weight (18.5≤BMI<23) | 373 (65.7%)         |       | 333 (64.8%)                      |       | 40 (74.1%)                                                |       |         |
|                                                            | Overweight (23≤BMI<25)      | 94 (16.5%)          |       | 90 (17.5%)                       |       | 4 (7.4%)                                                  |       |         |
|                                                            | Obese (BMI≥25)              | 31 (5.5%)           |       | 28 (5.4%)                        |       | 3 (5.6%)                                                  |       |         |
|                                                            | Decline to answer           | 16 (2.8%)           |       | 16 (3.1%)                        |       | 0 (0.0%)                                                  |       |         |
| Currently smoke cigarettes (cough questionnaire)           | No                          | 391 (68.8%)         |       | 346 (67.3%)                      |       | 45 (83.3%)                                                |       | 0.016   |
|                                                            | Yes                         | 177 (31.2%)         |       | 168 (32.7%)                      |       | 9 (16.7%)                                                 |       |         |
| Use of alcohol                                             | Abstain                     | 191 (33.6%)         |       | 169 (32.9%)                      |       | 22 (40.7%)                                                |       | 0.245   |
|                                                            | Currently consume alcohol   | 377 (66.4%)         |       | 345 (67.1%)                      |       | 32 (59.3%)                                                |       |         |
| Vigorous exercise in past 30 days                          | No                          | 305 (53.7%)         |       | 268 (52.1%)                      |       | 37 (68.5%)                                                |       | 0.022   |
|                                                            | Yes                         | 263 (46.3%)         |       | 246 (47.9%)                      |       | 17 (31.5%)                                                |       |         |
| Ever spoken with a physician for your cough †              | No                          | 313 (55.1%)         |       | 313 (60.9%)                      |       | 0 (0.0%)                                                  |       | < .001  |
|                                                            | Yes                         | 251 (44.2%)         |       | 197 (38.3%)                      |       | 54 (100.0%)                                               |       |         |
| Severity VAS (0-100) ‡                                     |                             | Mean                | SD    | Mean                             | SD    | Mean                                                      | SD    |         |
| Severity of cough over the past 2 weeks                    |                             | 40.54               | 21.6  | 40.99                            | 21.68 | 36.30                                                     | 20.50 | 0.129   |
| Severity of cough on the worst day during the past 2 weeks |                             | 49.88               | 23.93 | 50.33                            | 23.88 | 45.65                                                     | 24.17 | 0.172   |

† Sample size: Total CC(N=564), All other CC patients (N=510), CC patients without known underlying disease (N=54)

‡ Sample size: Total CC(N=567), All other CC patients (N=513), CC patients without known underlying disease (N=54)

**Supplementary Table 5. Self-reported medication usage and satisfaction between chronic cough patients whose underlying disease were unknown and all other chronic cough patient**

|                               | Total CC<br>(N=564) | All other CC patients<br>(N=510) | CC patients without<br>known underlying disease<br>(N=54) | p-value |
|-------------------------------|---------------------|----------------------------------|-----------------------------------------------------------|---------|
|                               | Count (%)           | Count (%)                        | Count (%)                                                 |         |
| None                          | 289 (50.9%)         | 268 (52.1%)                      | 21 (38.9%)                                                | 0.056   |
| Anti-tussives                 | 69 (12.1%)          | 57 (11.1%)                       | 12 (22.2%)                                                | 0.018   |
| Anti-epileptics               | 1 (0.2%)            | 1 (0.2%)                         | 0 (0.0%)                                                  | 0.745   |
| Proton pump inhibitors        | 10 (1.8%)           | 10 (1.9%)                        | 0 (0.0%)                                                  | 0.299   |
| H2 blockers                   | 10 (1.8%)           | 9 (1.8%)                         | 1 (1.9%)                                                  | 0.963   |
| Nasal Steroids                | 21 (3.7%)           | 20 (3.9%)                        | 1 (1.9%)                                                  | 0.445   |
| Inhaled steroids              | 57 (10.0%)          | 50 (9.7%)                        | 7 (13.0%)                                                 | 0.464   |
| Oral steroids                 | 13 (2.3%)           | 11 (2.1%)                        | 2 (3.7%)                                                  | 0.471   |
| Beta-agonists                 | 11 (1.9%)           | 10 (1.9%)                        | 1 (1.9%)                                                  | 0.956   |
| 1st generation antihistamines | 8 (1.4%)            | 7 (1.4%)                         | 1 (1.9%)                                                  | 0.777   |
| 2nd generation antihistamine  | 24 (4.2%)           | 20 (3.9%)                        | 4 (7.4%)                                                  | 0.228   |
| Cough drops                   | 60 (10.6%)          | 59 (11.5%)                       | 1 (1.9%)                                                  | 0.028   |
| Antibiotics                   | 46 (8.1%)           | 42 (8.2%)                        | 4 (7.4%)                                                  | 0.833   |
| ICS-LABA                      | 51 (9.0%)           | 46 (8.9%)                        | 5 (9.3%)                                                  | 0.953   |
| Others                        | 73 (12.9%)          | 61 (11.9%)                       | 12 (22.2%)                                                | 0.033   |

Supplementary Table 6. Comparison of demographics, health characteristics and cough severity in chronic cough patients not greatly satisfied with treatment effectiveness and other chronic cough patients

|                                                  |                             | Total<br>(N=568) |       | All other CC patients<br>(N=477) |       | CC patients not greatly<br>satisfied with treatment<br>effectiveness<br>(N=91) | p-value |        |
|--------------------------------------------------|-----------------------------|------------------|-------|----------------------------------|-------|--------------------------------------------------------------------------------|---------|--------|
|                                                  |                             | Mean             | SD    | Mean                             | SD    | Mean                                                                           | SD      |        |
| Age                                              |                             | 56.01            | 15.15 | 56.32                            | 15.07 | 54.36                                                                          | 15.57   | 0.259  |
| Charlson Comorbidity index                       |                             | 0.33             | 0.67  | 0.29                             | 0.62  | 0.52                                                                           | 0.85    | 0.003  |
| Adapted Charlson Comorbidity index               |                             | 0.23             | 0.55  | 0.22                             | 0.52  | 0.27                                                                           | 0.68    | 0.384  |
|                                                  |                             | Count (%)        |       | Count (%)                        |       | Count (%)                                                                      |         |        |
| Gender                                           | Male                        | 347 (61.1%)      |       | 307 (64.4%)                      |       | 40 (44.0%)                                                                     |         | < .001 |
|                                                  | Female                      | 221 (38.9%)      |       | 170 (35.6%)                      |       | 51 (56.0%)                                                                     |         |        |
| Currently employed                               | No                          | 252 (44.4%)      |       | 220 (46.1%)                      |       | 32 (35.2%)                                                                     |         | 0.054  |
|                                                  | Yes                         | 316 (55.6%)      |       | 257 (53.9%)                      |       | 59 (64.8%)                                                                     |         |        |
| BMI category                                     | Underweight (BMI<18.5)      | 54 (9.5%)        |       | 42 (8.8%)                        |       | 12 (13.2%)                                                                     |         | 0.097  |
|                                                  | Normal weight (18.5≤BMI<23) | 373 (65.7%)      |       | 311 (65.2%)                      |       | 62 (68.1%)                                                                     |         |        |
|                                                  | Overweight (23≤BMI<25)      | 94 (16.5%)       |       | 87 (18.2%)                       |       | 7 (7.7%)                                                                       |         |        |
|                                                  | Obese (BMI≥25)              | 31 (5.5%)        |       | 24 (5.0%)                        |       | 7 (7.7%)                                                                       |         |        |
|                                                  | Decline to answer           | 16 (2.8%)        |       | 13 (2.7%)                        |       | 3 (3.3%)                                                                       |         |        |
| Currently smoke cigarettes (cough questionnaire) | No                          | 391 (68.8%)      |       | 318 (66.7%)                      |       | 73 (80.2%)                                                                     |         | 0.011  |
|                                                  | Yes                         | 177 (31.2%)      |       | 159 (33.3%)                      |       | 18 (19.8%)                                                                     |         |        |
| Use of alcohol                                   | Abstain                     | 191 (33.6%)      |       | 162 (34.0%)                      |       | 29 (31.9%)                                                                     |         | 0.698  |
|                                                  | Currently consume alcohol   | 377 (66.4%)      |       | 315 (66.0%)                      |       | 62 (68.1%)                                                                     |         |        |
| Vigorous exercise in past 30 days                | No                          | 305 (53.7%)      |       | 266 (55.8%)                      |       | 39 (42.9%)                                                                     |         | 0.024  |
|                                                  | Yes                         | 263 (46.3%)      |       | 211 (44.2%)                      |       | 52 (57.1%)                                                                     |         |        |
| Ever spoken with a physician for your cough †    | No                          | 313 (55.1%)      |       | 293 (61.4%)                      |       | 20 (22.0%)                                                                     |         | < .001 |
|                                                  | Yes                         | 251 (44.2%)      |       | 180 (37.7%)                      |       | 71 (78.0%)                                                                     |         |        |
| Severity VAS (0-100) ‡                           |                             |                  |       |                                  |       |                                                                                |         |        |
|                                                  |                             | Mean             | SD    | Mean                             | SD    | Mean                                                                           | SD      |        |
| Severity of cough over the past 2 weeks          |                             | 40.54            | 21.6  | 39.63                            | 21.42 | 45.34                                                                          | 22.04   | 0.021  |

|                                                            |             |       |             |      |            |       |       |
|------------------------------------------------------------|-------------|-------|-------------|------|------------|-------|-------|
| Severity of cough on the worst day during the past 2 weeks | 49.88       | 23.93 | 48.44       | 23.8 | 57.41      | 23.32 | 0.001 |
|                                                            | Count (%)   |       | Count (%)   |      | Count (%)  |       |       |
| Severity VAS (0-100) exceeding 40                          | 255 (45.0%) |       | 207 (43.5%) |      | 48 (52.7%) |       |       |

† Sample size: Total CC(N=564), Not RCC (N=473), RCC (N=91)  
‡ Sample size: Total CC(N=567), Not RCC (N=476), RCC (N=91)
